# Supplementary material for: Confirmation and Distribution of Tetrodotoxin for the First Time in Terrestrial Invertebrates: Two Terrestrial Flatworm Species (Bipalium adventitium and Bipalium kewense)
Source: PLoS One. 2014 Jun 25;9(6):e100718. doi: 10.1371/journal.pone.0100718 (PMC4070999; doi:10.1371/journal.pone.0100718)
Supplement: Table S1 — Raw data for TTX levels and distribution in Bipalium adventitium and Bipalium kewense. (XLSX) [file pone.0100718.s001.xlsx]

## Sheet: Sheet1
Sample	Species	Absorbance	Absorbance	Absorbance	mean	stdev	%cv	Back calculation	Calculated conc (ng/mL)	Extraction volume (mL)	Concentration (ng)	Final TTX concentration (ng)	Mass (g)	mass (mg)	TTX ng/mg bodyweight
689 egg	B. adventitium	1.30967	1.20867	1.19567	1.238	0.0624046	5.04076	1.97352	94.0842	0.8	75.2673	72.119	0.01072	10.72	6.72752
690 egg	B. adventitium	1.01567	1.01267	1.02567	1.018	0.00680686	0.66865	2.14046	138.185	0.8	110.548	107.4	0.01166	11.66	9.21096
690a egg	B. adventitium	0.982667	1.08167	1.04967	1.038	0.0505206	4.86711	2.12528	133.44	0.8	106.752	103.603	0.01357	13.57	7.63473
691 egg	B. adventitium	1.10867	1.10767	1.04367	1.08667	0.0372424	3.42722	2.08835	122.562	0.8	98.0493	94.9009	0.00452	4.52	20.9958
694 egg	B. adventitium	1.02467	1.00467	1.12067	1.05	0.0620108	5.90579	2.11618	130.671	0.8	104.537	101.388	0.00467	4.67	21.7106
696 egg	B. adventitium	1.54067	1.40567	1.48967	1.47867	0.0681689	4.61016	1.79089	61.7858	0.8	49.4287	46.2803	0.02392	23.92	1.9348
697 egg	B. adventitium	1.18867	1.21067	1.07967	1.15967	0.0701498	6.04914	2.03296	107.884	0.8	86.3076	83.1593	0.01562	15.62	5.3239
699 egg	B. adventitium	1.17567	1.12967	1.12167	1.14233	0.0291433	2.55121	2.04611	111.202	0.8	88.9615	85.8132	0.01027	10.27	8.35572
674-H	B. adventitium	1.31467	1.36667	1.33567	1.339	0.0261598	1.95368	1.89687	78.8631	0.8	63.0904	59.9421	0.002	2	29.9711
674-P	B. adventitium	1.90067	2.00067	1.96567	1.95567	0.0507445	2.59474	1.42892	26.8486	0.8	21.4789	18.3306	0.082	82	0.223544
674-B	B. adventitium	1.59967	1.59267	1.60767	1.6	0.00750555	0.469097	1.69882	49.9823	0.8	39.9858	36.8375	0.058	58	0.63513
657-H	B. adventitium	1.30167	1.21667	1.44267	1.32033	0.11415	8.64558	1.91104	81.4777	0.8	65.1821	62.0338	0.001	1	62.0338
657-P	B. adventitium	1.49267	1.50567	1.41367	1.47067	0.0497896	3.38551	1.79696	62.6556	0.8	50.1244	46.9761	0.075	75	0.626348
657-B	B. adventitium	1.22367	1.33767	1.41867	1.32667	0.0979643	7.38424	1.90623	80.581	0.8	64.4648	61.3165	0.065	65	0.943331
667	B. adventitium	1.50967	1.54567	1.46867	1.508	0.038527	2.55484	1.76863	58.6988	0.8	46.9591	43.8108	0.068	68	0.644276
673	B. adventitium	1.24267	1.32767	1.32667	1.299	0.0487887	3.75586	1.92723	84.5721	0.8	67.6577	64.5094	0.009	9	7.16771
664	B. adventitium	1.38267	1.30167	1.35767	1.34733	0.0414769	3.07844	1.89055	77.7231	0.8	62.1785	59.0301	0.003	3	19.6767
690 H	B. adventitium	1.24233	1.19433	1.19933	1.212	0.0263881	2.17724	1.62231	41.9097	0.8	33.5277	29.1044	0.002	2	14.5522
690 P	B. adventitium	0.986333	0.966333	0.991333	0.981333	0.0132288	1.34804	1.83968	69.1319	0.8	55.3055	50.8822	0.027	27	1.88453
690 B	B. adventitium	0.896333	0.858333	0.846333	0.867	0.0261024	3.01065	1.94742	88.5968	0.8	70.8774	66.4541	0.014	14	4.74672
692 H	B. adventitium	1.02533	1.08433	0.960333	1.02333	0.0620242	6.061	1.8001	63.1103	0.8	50.4883	46.065	0.002	2	23.0325
692 P	B. adventitium	0.976333	0.947333	0.914333	0.946	0.0310215	3.27923	1.87297	74.6404	0.8	59.7123	55.289	0.051	51	1.0841
692 B	B. adventitium	0.931333	0.842333	0.859333	0.877667	0.0472476	5.38332	1.93737	86.5698	0.8	69.2559	64.8325	0.037	37	1.75223
643 H	B. adventitium	1.19533	1.02933	1.01133	1.07867	0.101436	9.40386	1.74796	55.9704	0.8	44.7763	40.353	0.002	2	20.1765
643 P	B. adventitium	1.15633	1.00133	1.01333	1.057	0.0862342	8.15839	1.76838	58.6645	0.8	46.9316	42.5083	0.063	63	0.674735
643 B	B. adventitium	0.779333	0.759333	0.762333	0.767	0.0107858	1.40623	2.04165	110.065	0.8	88.0523	83.629	0.031	31	2.69771
654 H	B. adventitium	1.01533	1.03533	1.02733	1.026	0.0100664	0.981135	1.79759	62.7462	0.8	50.197	45.7737	0.001	1	45.7737
654 P	B. adventitium	0.853333	0.796333	0.786333	0.812	0.0361432	4.45114	1.99925	99.8266	0.8	79.8613	75.4379	0.033	33	2.286
654 B	B. adventitium	0.850333	0.912333	0.843333	0.868667	0.0379781	4.372	1.94585	88.277	0.8	70.6216	66.1983	0.018	18	3.67768
648	B. adventitium	2.62347	2.69347		2.65847	0.0494975	1.86188	1.18046	15.1518	0.6	9.09108	4.35747	0.204	204	0.0213601
637	B. adventitium	2.40647	2.54047		2.47347	0.0947523	3.83074	1.3047	20.1697	0.6	12.1018	7.36824	0.181	181	0.0407085
659	B. adventitium	2.9065	2.8945		2.9005	0.00848528	0.292545	1.01793	10.4215	0.6	6.2529	1.51929	0.078	78	0.0194781
516A4C9C8-1	B. kewense	1.58967	1.53367	1.48767	1.537	0.0510816	3.32346	1.74662	55.7986	0.8	44.6389	41.4906	0.008	8	5.18632
516A4AA13-1	B. kewense	1.29267	1.31967	1.25867	1.29033	0.0305669	2.36891	1.9338	85.8626	0.8	68.69	65.5417	0.008	8	8.19272
516A4AA7E	B. kewense	1.41267	1.41767	1.29067	1.37367	0.0719236	5.23588	1.87057	74.2279	0.8	59.3823	56.234	0.011	11	5.11218
614K-H	B. kewense	0.631667	0.799667	0.624667	0.685333	0.0990774	14.4568	2.26179	182.721	0.6	109.632	108.396	0.005	5	21.6792
614K-P	B. kewense	1.30467	1.37767	1.38467	1.35567	0.0443058	3.26819	1.88423	76.5996	0.8	61.2796	58.1313	0.028	28	2.07612
614K-B	B. kewense	2.36967	2.43867	2.40567	2.40467	0.0345109	1.43516	1.0882	12.2519	0.8	9.8015	6.65319	0.12	120	0.0554432
516A4Q2A-H	B. kewense	0.683667	0.694667	0.783667	0.720667	0.0548361	7.60908	2.22237	166.867	0.6	100.12	100.12	0.008	8	12.515
516A4Q2A-P	B. kewense	1.71767	1.67967	1.89067	1.76267	0.112468	6.38055	1.57538	37.6165	0.8	30.0932	26.9449	0.085	85	0.316999
516A4Q2A-B	B. kewense	1.37767	1.33067	1.57867	1.429	0.131728	9.21821	1.82858	67.3873	0.8	53.9098	50.7615	0.159	159	0.319255
606T H	B. kewense	0.802333	0.787333	0.799333	0.796333	0.00793725	0.996725	2.01401	103.278	0.8	82.6227	78.1994	0.005	5	15.6399
606T P	B. kewense	1.63533	1.59633	1.63333	1.62167	0.0219621	1.35429	1.23627	17.2295	0.8	13.7836	9.36032	0.132	132	0.0709115
606T B	B. kewense	0.939333	1.01533	1.01933	0.991333	0.0450777	4.54718	1.83026	67.648	0.8	54.1184	49.6951	0.029	29	1.71362
616T19 H	B. kewense	0.948333	0.976333	0.992333	0.972333	0.0222711	2.29048	1.84816	70.4952	0.8	56.3961	51.9728	0.003	3	17.3243
616T19 P	B. kewense	0.988333	0.991333	0.993333	0.991	0.00251661	0.253947	1.83057	67.697	0.8	54.1576	49.7343	0.073	73	0.681291
616T19 B	B. kewense	0.995333	0.935333	1.02333	0.984667	0.0449592	4.56594	1.83654	68.6337	0.8	54.9069	50.4836	0.028	28	1.80299
516A4C9C8 H	B. kewense	0.840333	0.816333	0.775333	0.810667	0.0328684	4.05449	2.0005	100.116	0.8	80.0926	75.6693	0.003	3	25.2231
516A4C9C8 P	B. kewense	1.42233	1.32833	1.37633	1.37567	0.0470035	3.41678	1.46809	29.3823	0.8	23.5059	19.0826	0.093	93	0.205189
516A4C9C8 B	B. kewense	0.859333	0.774333	0.786333	0.806667	0.0460036	5.70293	2.00427	100.988	0.8	80.7908	76.3675	0.033	33	2.31417
516A4AA13 H	B. kewense	1.09333	0.932333	0.864333	0.963333	0.117605	12.2082	1.85664	71.8853	0.8	57.5083	53.085	0.002	2	26.5425
516A4AA13 P	B. kewense	0.995333	0.985333	1.00433	0.995	0.00950438	0.955215	1.8268	67.1119	0.8	53.6896	49.2663	0.066	66	0.746458
516A4AA13 B	B. kewense	1.12233	1.04133	0.937333	1.03367	0.092738	8.97175	1.79036	61.7111	0.8	49.3689	44.9456	0.027	27	1.66465
6	B. kewense	1.77447	1.77147		1.77297	0.00212132	0.119648	1.77512	59.5825	0.6	35.7495	31.0159	0.045	45	0.689242
606AA	B. kewense	1.67147	1.97847		1.82497	0.217082	11.8951	1.7402	54.9792	0.6	32.9875	28.2539	0.026	26	1.08669
502M2D14	B. kewense	1.54047	1.88547		1.71297	0.243952	14.2414	1.81541	65.375	0.6	39.225	34.4914	0.021	21	1.64245
